# Supplementary material
Source: MDPI journal article supplement (https://www.mdpi.com/search?q=ijms-19-00162)
Supplement: s001 [file ijms-19-00162-s001.pdf]

Article

# Effects of Fluoxetine on Hippocampal Neurogenesis and Neuroprotection in the Model of Global Cerebral Ischemia in Rats

Marina Khodanovich <sup>1,\*</sup>, Alena Kisel <sup>1</sup>, Marina Kudabaeva <sup>1</sup>, Galina Chernysheva <sup>2</sup>, Vera Smolyakova <sup>2</sup>, Elena Krutenkova <sup>1</sup>, Irina Wasserlauf <sup>1</sup>, Mark Plotnikov <sup>2</sup> and Vasily Yarnykh <sup>1,3</sup>

Supplementary Table S1. Comparison of immunohistochemical parameters in the experimental groups.

| Labeling                    | Region | Group,<br>F ( <i>p</i> )            | Post-hoc test, 10 days |                                               |                                               | Post-hoc test, 30 days |                                              |                                                                   |
|-----------------------------|--------|-------------------------------------|------------------------|-----------------------------------------------|-----------------------------------------------|------------------------|----------------------------------------------|-------------------------------------------------------------------|
|                             |        |                                     | Sham-operated          | Ischemia                                      | Ischemia+<br>Fluoxetine                       | Sham-operated          | Ischemia                                     | Ischemia+<br>Fluoxetine                                           |
| NeuN, BrdU                  | hilus  | <b>6.46</b><br>( <i>p</i> = 0.005)  | 9.66 ± 0.72            | 8.11 ± 0.81                                   | 10.58 ± 0.58                                  | 9.09 ± 0.54            | 7.11 ± 0.77                                  | 8.99 ± 0.29                                                       |
|                             | DG     | 0.44<br>( <i>p</i> = 0.64)          | 63.8 ± 2.36            | 74.6 ± 1.66                                   | 70.0 ± 2.44                                   | 66.8 ± 4.91            | 61.0 ± 4.49                                  | 60.1 ± 2.44                                                       |
|                             | CA1    | <b>43.48</b><br>( <i>p</i> < 0.001) | 28.22 ± 0.61           | <b>11.64 ± 3.44</b><br>( <i>p</i> < 0.001, S) | <b>26.62 ± 2.09</b><br>( <i>p</i> < 0.001, I) | 30.07 ± 2.30           | <b>5.85 ± 1.38</b><br>( <i>p</i> < 0.001, S) | <b>16.27 ± 2.13</b><br>( <i>p</i> = 0.003, S; <i>p</i> = 0.04, I) |
|                             | CA2    | <b>26.96</b><br>( <i>p</i> < 0.001) | 26.58 ± 2.38           | <b>12.52 ± 2.76</b><br>( <i>p</i> < 0.001, S) | 19.64 ± 0.77                                  | 21.04 ± 0.69           | <b>9.44 ± 1.75</b><br>( <i>p</i> = 0.001, S) | 15.90 ± 1.17                                                      |
|                             | CA3    | <b>15.99</b><br>( <i>p</i> < 0.001) | 15.3 ± 1.43            | 12.1 ± 1.29                                   | 16.0 ± 0.58                                   | 16.9 ± 0.72            | <b>8.5 ± 1.40</b><br>( <i>p</i> < 0.001, S)  | 13.4 ± 0.66                                                       |
| BrdU+ cells,<br>per section | SGZ    | <b>19.11</b><br>( <i>p</i> < 0.001) | 11.87 ± 2.12           | <b>48.70 ± 4.69</b><br>( <i>p</i> < 0.001, S) | <b>12.89 ± 5.10</b><br>( <i>p</i> < 0.001, I) | 5.33 ± 2.19            | 4.15 ± 0.86                                  | 3.82 ± 0.57                                                       |
|                             | GL     | <b>19.62</b><br>( <i>p</i> < 0.001) | 4.53 ± 1.97            | <b>31.00 ± 4.16</b><br>( <i>p</i> < 0.001, S) | <b>9.08 ± 3.03</b><br>( <i>p</i> < 0.001, I)  | 8.43 ± 1.99            | 15.90 ± 3.75                                 | 7.76 ± 1.58                                                       |

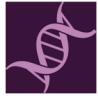

|                                   |                                     |                                     |                                     |                                               |                                                |                                               |                                                |                                                |                                              |
|-----------------------------------|-------------------------------------|-------------------------------------|-------------------------------------|-----------------------------------------------|------------------------------------------------|-----------------------------------------------|------------------------------------------------|------------------------------------------------|----------------------------------------------|
|                                   | hilus                               | <b>13.35</b><br>( <i>p</i> < 0.001) | 2.87 ± 1.24                         | <b>24.00 ± 5.88</b><br>( <i>p</i> < 0.001, S) | <b>2.17 ± 0.73</b><br>( <i>p</i> < 0.001, I)   | 3.10 ± 0.62                                   | 3.67 ± 0.49                                    | 3.15 ± 0.97                                    |                                              |
|                                   | CA1                                 | <b>77.20</b><br>( <i>p</i> < 0.001) | 2.93 ± 0.93                         | <b>91.90 ± 8.36</b><br>( <i>p</i> < 0.001, S) | <b>10.39 ± 2.97</b><br>( <i>p</i> < 0.001, I)  | 5.87 ± 0.95                                   | <b>46.16 ± 10.93</b><br>( <i>p</i> < 0.001, S) | <b>8.70 ± 2.63</b><br>( <i>p</i> = 0.002, I)   |                                              |
|                                   | CA2                                 | <b>17.68</b><br>( <i>p</i> < 0.001) | 0.63 ± 0.37                         | <b>14.00 ± 4.16</b><br>( <i>p</i> < 0.001, S) | <b>0.89 ± 0.54</b><br>( <i>p</i> < 0.001, I)   | 1.10 ± 0.56                                   | 6.87 ± 1.96                                    | 0.60 ± 0.37                                    |                                              |
| NeuN+/BrdU+<br>cells, per section | SGZ                                 | 1.31<br>( <i>p</i> = 0.3)           | 0.17 ± 0.17                         | 0.04 ± 0.04                                   | 0.47 ± 0.33                                    | 0.80 ± 0.37                                   | 2.80 ± 1.36                                    | 0.67 ± 0.44                                    |                                              |
|                                   | GL                                  | 0.56<br>( <i>p</i> = 0.6)           | 0.00 ± 0.00                         | 0.28 ± 0.20                                   | 1.05 ± 0.61                                    | 10.0 ± 1.58                                   | 7.40 ± 2.16                                    | 8.93 ± 1.18                                    |                                              |
|                                   | hilus                               | 2.59<br>( <i>p</i> = 0.1)           | 0.00 ± 0.00                         | 0.00 ± 0.00                                   | 0.00 ± 0.00                                    | 0.00 ± 0.00                                   | 0.80 ± 0.37                                    | 0.25 ± 0.19                                    |                                              |
|                                   | CA1                                 | 0.73<br>( <i>p</i> = 0.1)           | 0.00 ± 0.00                         | 0.20 ± 0.20                                   | 0.00 ± 0.00                                    | 1.00 ± 0.43                                   | 0.60 ± 0.24                                    | 0.23 ± 0.12                                    |                                              |
|                                   | CA2                                 | 2.18 ( <i>p</i> = 0.1)              | 0.00 ± 0.00                         | 0.13 ± 0.13                                   | 0.00 ± 0.00                                    | 0.08 ± 0.08                                   | 0.40 ± 0.24                                    | 0.05 ± 0.05                                    |                                              |
| Iba1, BrdU                        | Iba1+ cells,<br>per<br>100 × 100 μm | CA1                                 | <b>45.49</b><br>( <i>p</i> < 0.001) | 1.43 ± 0.24                                   | <b>12.98 ± 2.06</b><br>( <i>p</i> < 0.001, S)  | <b>2.38 ± 0.36</b><br>( <i>p</i> < 0.001, I)  | 1.50 ± 0.19                                    | <b>8.30 ± 1.59</b><br>( <i>p</i> = 0.003, S)   | <b>1.53 ± 0.11</b><br>( <i>p</i> = 0.003, I) |
|                                   | Iba1+/BrdU+ cells, per<br>section   | CA1                                 | <b>26.80</b><br>( <i>p</i> < 0.001) | 3.25 ± 2.36                                   | <b>100.0 ± 26.52</b><br>( <i>p</i> < 0.001, S) | <b>5.00 ± 3.06</b><br>( <i>p</i> < 0.001, I)  | 3.00 ± 2.39                                    | <b>58.74 ± 11.11</b><br>( <i>p</i> = 0.045, S) | <b>3.75 ± 2.50</b><br>( <i>p</i> = 0.049, I) |
|                                   | BrdU+ cells,<br>per section         | CA1                                 | <b>23.59</b><br>( <i>p</i> < 0.001) | 6.75 ± 2.55                                   | <b>107.5 ± 26.98</b><br>( <i>p</i> < 0.001, S) | <b>22.50 ± 4.68</b><br>( <i>p</i> = 0.002, I) | 11.25 ± 4.15                                   | <b>73.44 ± 15.20</b><br>( <i>p</i> = 0.03, S)  | <b>12.50 ± 3.95</b><br>( <i>p</i> = 0.04, I) |
| GFAP, BrdU                        | GFAP+ cells,<br>per section         | SGZ                                 | <b>18.89</b><br>( <i>p</i> < 0.001) | 183.5 ± 9.3                                   | <b>131.3 ± 7.4</b><br>( <i>p</i> = 0.02, S)    | <b>179.0 ± 11.8</b><br>( <i>p</i> = 0.04, I)  | 164.7 ± 9.4                                    | <b>104.7 ± 7.0</b><br>( <i>p</i> = 0.005, S)   | <b>159.0 ± 13.9</b><br>( <i>p</i> = 0.01, I) |



|     |                                   |     |                                   |              |                                               |                                             |              |              |                                                |
|-----|-----------------------------------|-----|-----------------------------------|--------------|-----------------------------------------------|---------------------------------------------|--------------|--------------|------------------------------------------------|
|     |                                   | SGZ | <b>5.41</b><br>( <i>p</i> = 0.01) | 5.67 ± 0.78  | <b>16.50 ± 3.67</b><br>( <i>p</i> = 0.03, S)  | <b>5.20 ± 2.46</b><br>( <i>p</i> = 0.01, I) | 2.45 ± 0.78  | 2.95 ± 1.07  | 2.11 ± 0.28                                    |
|     | GFAP+/BrdU+<br>cells, per section | GL  | <b>4.31</b><br>( <i>p</i> = 0.03) | 2.92 ± 1.08  | 4.70 ± 1.70                                   | 1.40 ± 0.29                                 | 1.61 ± 0.20  | 6.15 ± 1.86  | 3.04 ± 0.78                                    |
| DCX | DCX+ cells, per section           | DG  | 3.19<br>( <i>p</i> = 0.06)        | 63.27 ± 1.72 | <b>101.38 ± 9.92</b><br>( <i>p</i> = 0.04, S) | 80.16 ± 10.05                               | 61.63 ± 1.89 | 39.67 ± 3.52 | <b>84.35 ± 11.76</b><br>( <i>p</i> = 0.009, I) |

Data are results of a two-way factorial ANOVA: (1) F-criteria with *p* values in parentheses for the main effect of the group factor, (2) mean ± SEM values for the experimental groups with *p* values in parentheses for Bonferroni's correction of pairwise comparison of the groups at time points 10 days and 30 days after surgery, S – comparison with the sham-operated group, I – comparison with positive controls. Significant tests are highlighted in bold.
